# Supplementary material for: Substrate Specificity of SARS-CoV-2 Nsp10-Nsp16 Methyltransferase
Source: MDPI journal article supplement (doi:10.3390/v13091722), 2021-08-30
Supplement: s1 [file s1]

## Supplementary information

### **Substrate specificity of SARS-CoV-2 nsp10-nsp16 methyltransferase**

Roberto Benoni <sup>1,#</sup>, Petra Krafcikova<sup>1,#</sup>, Marek R. Baranowski<sup>2</sup>, Joanna Kowalska<sup>2</sup>, Evzen Boura<sup>1\*</sup>, Hana Cahová<sup>1\*</sup>

### Synthesis and spectroscopic characterization of m<sup>7</sup>GpppA

m<sup>7</sup>GpppA (2160 mOD, 0.101 mmol, 72%) was synthesized by coupling between adenosine 5'-diphosphate triethylammonium salt (ADP) and N<sup>7</sup>-methylguanosine 5'-phosphorimidazolide sodium salt (m<sup>7</sup>GMP-Im), which were both prepared as described earlier (Baranowski, J. Org. Chem. 2015, 80, 3982–3997).

ADP (2100 mOD, 0.140 mmol) was mixed with DMSO (0.8 mL) and ZnCl<sub>2</sub> (228 mg, 1.68 mmol) and left for 10 min under vigorous stirring at room temperature. Then, m<sup>7</sup>GMP-Im (3985 mOD, 0.350 mmol) was added and the reaction progress was monitored by RP HPLC until total conversion of ADP to m<sup>7</sup>GpppA was observed. The reaction was quenched by addition of a solution of Na<sub>2</sub>EDTA (8–10 mmol) and NaHCO<sub>3</sub> (~35 mmol) in deionized water (10 ml). The product was purified by DEAE Sephadex chromatography using a linear gradient of triethylammonium bicarbonate buffer (0.9 M) in water. Fractions containing the desired products (as verified by UV, HPLC, and MS analysis) were mixed together and evaporated under reduced pressure with repeated additions of 96% and, then, 99.8% ethanol (to decompose TEAB and remove residual water, respectively). The product was additionally purified by semi-preparative RP HPLC on a VisionHT C18 HighLoad column (Dr. Maisch, 250 mm x 20 mm, 10 µm, flow rate 5 mL/min) using a linear gradient of acetonitrile in 0.05 M ammonium acetate buffer (pH 5.9). The final product was lyophilized three times from water and analyzed by NMR and electrospray MS (ESI-).

<sup>1</sup>H NMR (500 MHz, D<sub>2</sub>O): δ 8.40 (s, 1H), 8.14 (s, 1H), 6.00 (d, *J* = 6.0 Hz, 1H), 5.86 (d, *J* = 3.4 Hz, 1H), 4.65 (t, *J* = 6.0 Hz, 1H), 4.51 – 4.47 (m, 2H), 4.42 – 4.24 (m, 8H), 3.99 (s, 3H); <sup>31</sup>P NMR (202 MHz, D<sub>2</sub>O) δ -10.35 – -10.89 (m, 2P), -22.20 (t, *J* = 19.4 Hz, 1P); <sup>31</sup>P NMR {<sup>1</sup>H} (202 MHz, D<sub>2</sub>O) δ -10.63 (d, *J* = 19.3 Hz, 1P), δ -10.67 (d, *J* = 19.3 Hz, 1P), -22.20 (t, *J* = 19.3 Hz, 1P); MS (ESI-)

Table S 1: Table of calculated and detected m/z values in LC-MS analysis of digested RNA before and after reaction with nsp10-nsp16.

| cap                               | calculated mass | detected mass |
|-----------------------------------|-----------------|---------------|
| m <sup>7</sup> Gp <sub>3</sub> A  | 785.085         | 785.078       |
| m <sup>7</sup> Gp <sub>3</sub> Am | 799.101         | 799.089       |
| m <sup>6</sup> Ap <sub>3</sub> A  | 769.09          | 769.078       |
| m <sup>6</sup> Ap <sub>3</sub> Am | 783.105         | n.d.          |
| m <sup>7</sup> Gp <sub>3</sub> G  | 400.036         | 400.032       |
| m <sup>7</sup> Gp <sub>3</sub> Gm | 407.044         | 407.042       |
| Ap <sub>3</sub> A                 | 755.074         | 755.076       |
| Ap <sub>3</sub> Am                | 769.090         | n.d.          |
| Ap <sub>4</sub> A                 | 417.016         | 417.022       |
| Ap <sub>4</sub> Am                | 424.024         | n.d.          |
| Ap <sub>5</sub> A                 | 457.000         | 457.000       |
| Ap <sub>5</sub> Am                | 464.007         | n.d.          |
| Ap <sub>3</sub> G                 | 771.069         | 771.062       |
| Ap <sub>3</sub> Gm                | 785.085         | 785.078       |
| Ap <sub>4</sub> G                 | 425.014         | 425.016       |
| Ap <sub>4</sub> Gm                | 432.022         | 432.028       |
| Ap <sub>5</sub> G                 | 464.997         | 464.995       |
| Ap <sub>5</sub> Gm                | 472.005         | n.d.          |
| Gp <sub>3</sub> G                 | 787.063         | 787.060       |
| Gp <sub>3</sub> Gm                | 801.08          | 801.065       |
| Gp <sub>4</sub> G                 | 433.011         | 433.005       |
| Gp <sub>4</sub> Gm                | 440.019         | n.d.          |
| NAD                               | 662.103         | 662.087       |
| NADm                              | 676.119         | n.d.          |
| CoA                               | 686.144         | 686.119       |
| CoAm                              | 700.16          | n.d.          |

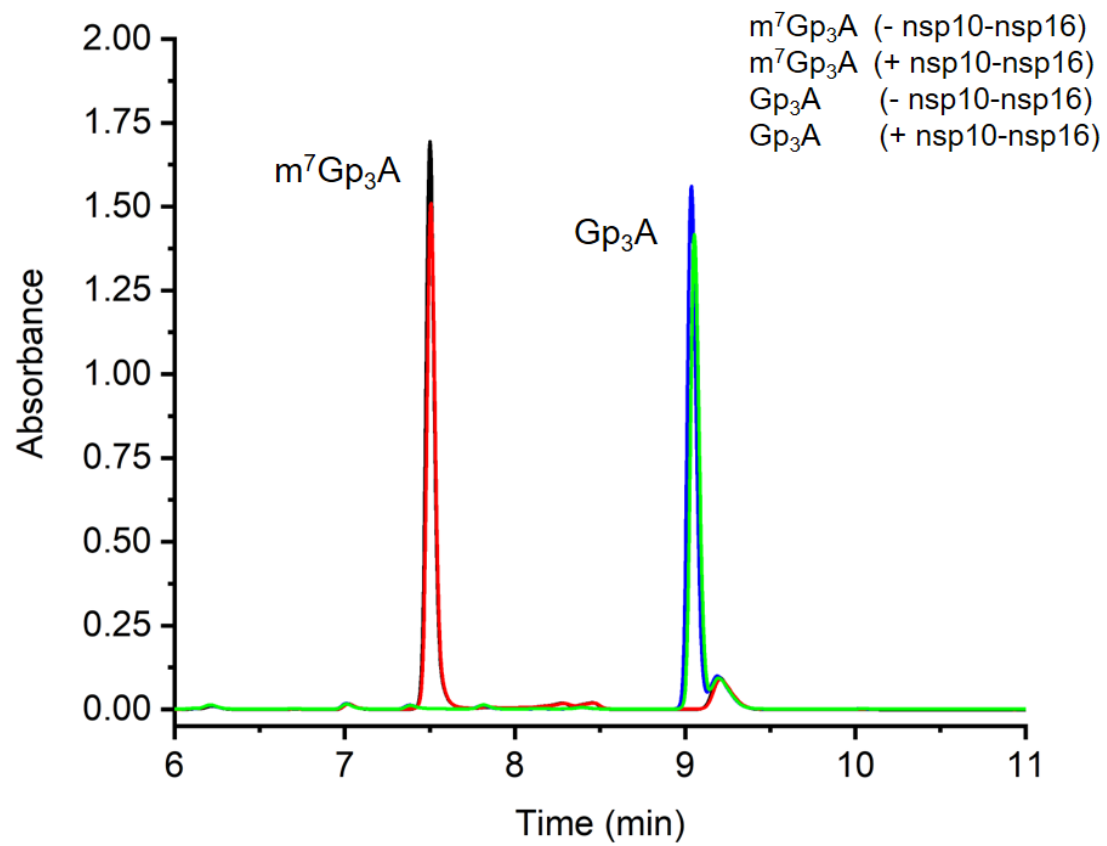

Figure S 1: The HPLC chromatogram of free RNA caps before and after the treatment with nsp10-nsp16.

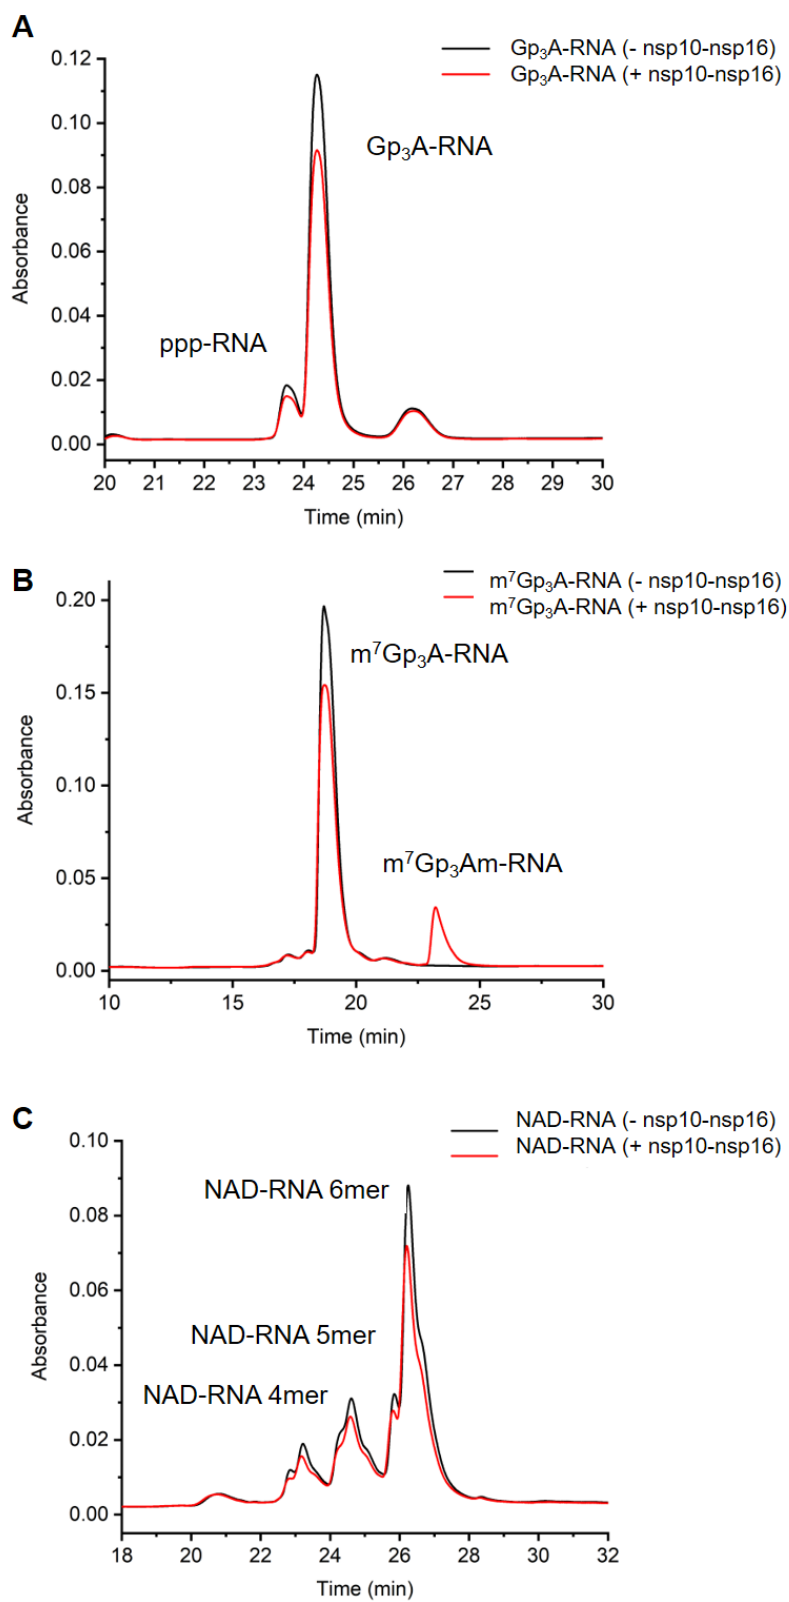

Figure S 2: HPLC chromatograms of hexamer RNA capped with Gp<sub>3</sub>A (A), m<sup>7</sup>Gp<sub>3</sub>A (B) and NAD (C) before and after the treatment with nsp10-nsp16.

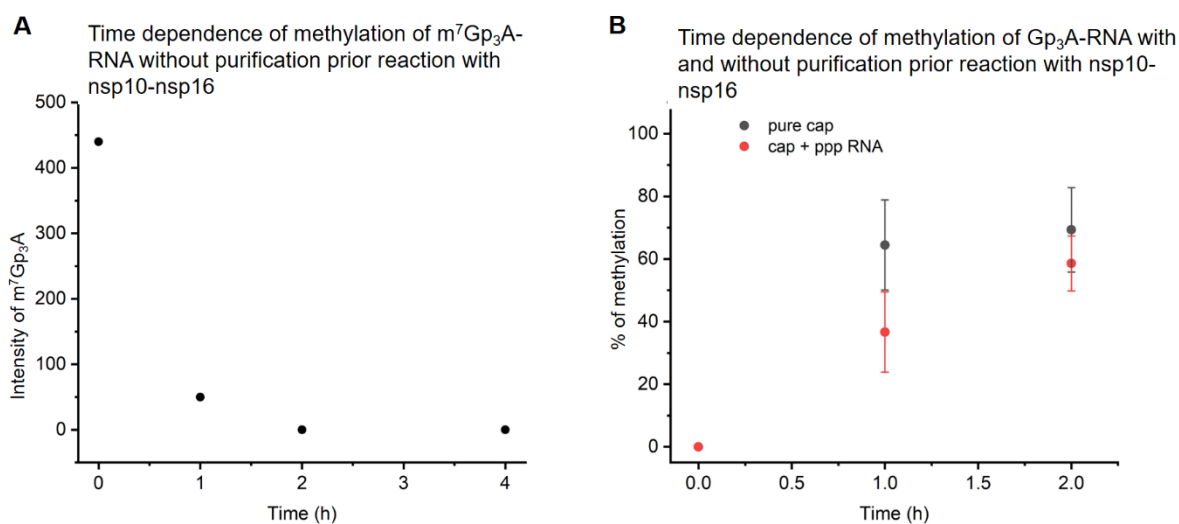

Figure S 3: Time dependence of the methylation of  $m^7Gp_3A$ -RNA by nsp10-nsp16 in the presence of SAM without purification of RNA prior reaction with nsp10-nsp16 (A). Comparison of methylation of  $Gp_3A$ -RNA with and without purification from ppp-RNA prior reaction with nsp10-nsp16 (B).

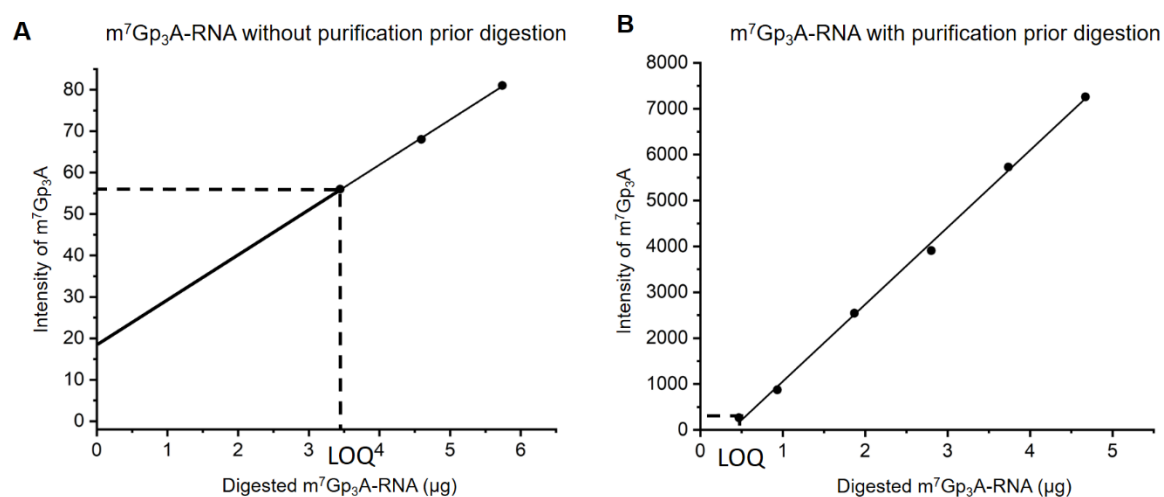

Figure S 4: Determination of the limit of detection and quantification of the method for  $m^7Gp_3A$  using  $m^7Gp_3A$ -RNA without purification prior to Nuclease P1 digestion (A) or purified RNA using RNA Clean and Concentrator™ kit prior to Nuclease P1 digestion (B).

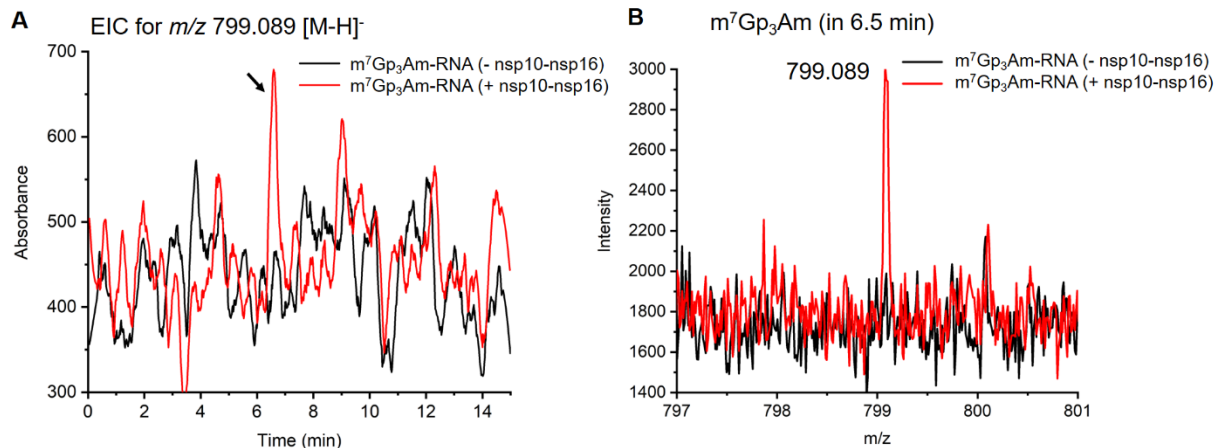

Figure S 5: LC-MS analysis of digested RNA before and after *nsp10-nsp16* treatment, using method Y. A) Extracted Ion Chromatogram (EIC) of  $m/z$  799.089 from  $m^7Gp_3A$ -RNA before and after the *nsp10-nsp16* treatment. B) MS spectrum of the  $m/z$  799.089 corresponding to  $m^7Gp_3Am$  before and after the *nsp10-nsp16* treatment.

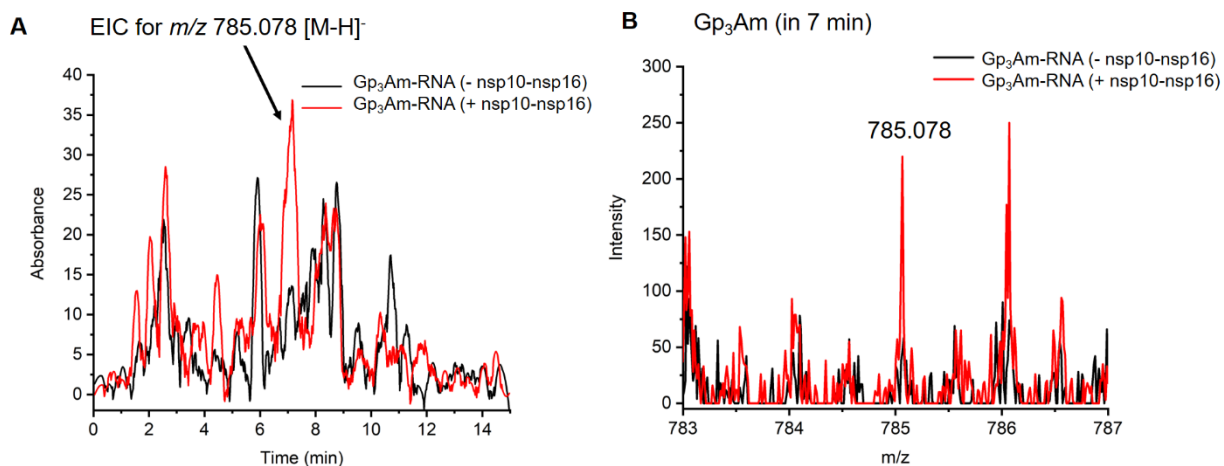

Figure S 6: LC-MS analysis of digested RNA before and after *nsp10-nsp16* treatment, using method Y. A) Extracted Ion Chromatogram (EIC) of  $m/z$  785.078 from  $Gp_3A$ -RNA before and after the *nsp10-nsp16* treatment. B) MS spectrum of the  $m/z$  785.078 corresponding to  $Gp_3Am$  before and after the *nsp10-nsp16* treatment.

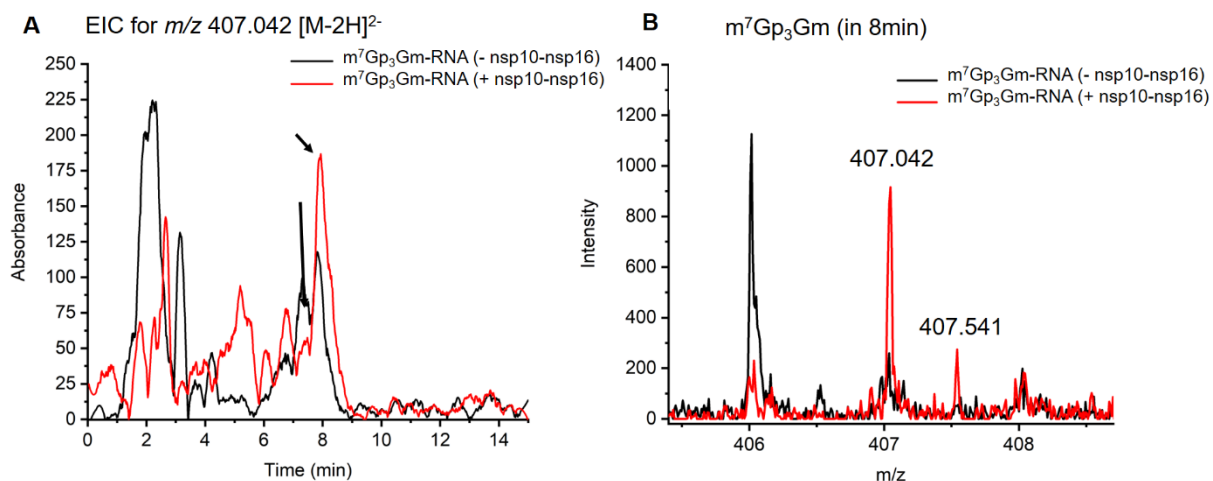

Figure S 7: LC-MS analysis of digested RNA before and after *nsp10-nsp16* treatment, using method Y. A) Extracted Ion Chromatogram (EIC) of *m/z* 407.042 from *m*<sup>7</sup>Gp<sub>3</sub>G-RNA before and after the *nsp10-nsp16* treatment. B) MS spectrum of the *m/z* 407.042 corresponding to *m*<sup>7</sup>Gp<sub>3</sub>Gm before and after the *nsp10-nsp16* treatment.

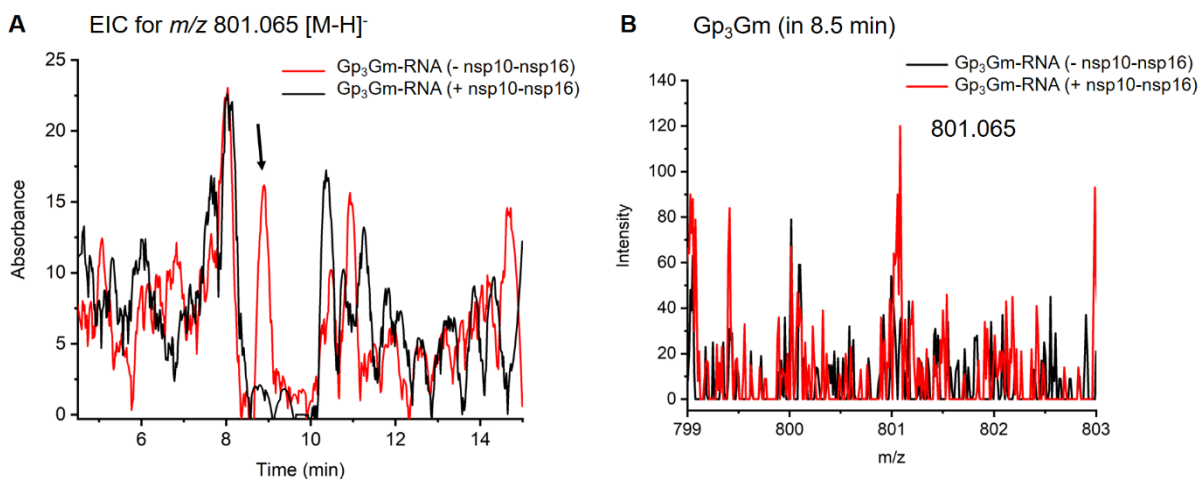

Figure S 8: LC-MS analysis of digested RNA before and after *nsp10-nsp16* treatment, using method Y. A) Extracted Ion Chromatogram (EIC) of *m/z* 801.065 from Gp<sub>3</sub>G-RNA before and after the *nsp10-nsp16* treatment. B) MS spectrum of the *m/z* 801.065 corresponding to Gp<sub>3</sub>Gm before and after the *nsp10-nsp16* treatment.



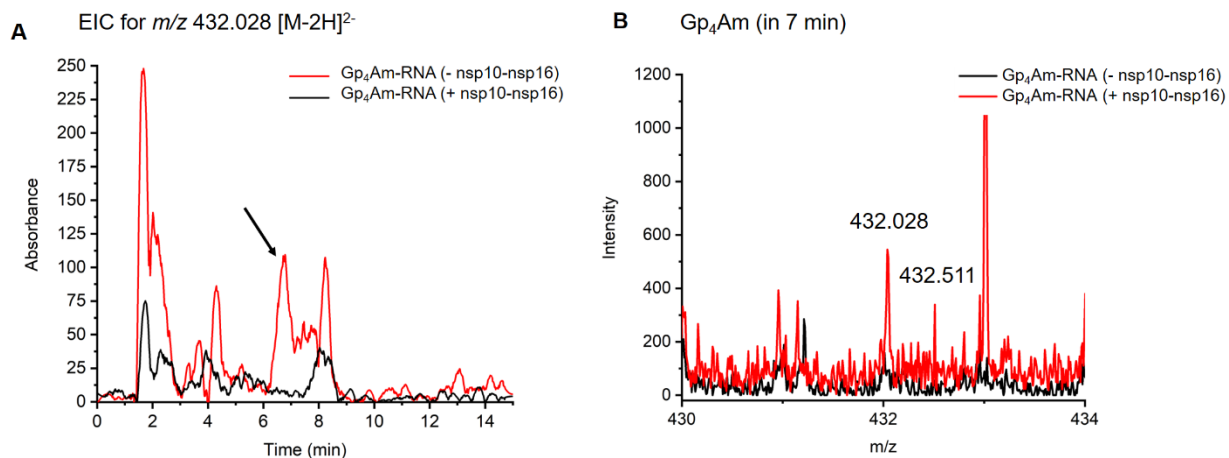

Figure S 9: LC-MS analysis of digested RNA before and after nsp10-nsp16 treatment, using method Y. A) Extracted Ion Chromatogram (EIC) of  $m/z$  432.028 from  $Gp_4A$ -RNA before and after the nsp10-nsp16 treatment. B) MS spectrum of the  $m/z$  432.028 corresponding to  $Gp_4Am$  before and after the nsp10-nsp16 treatment.

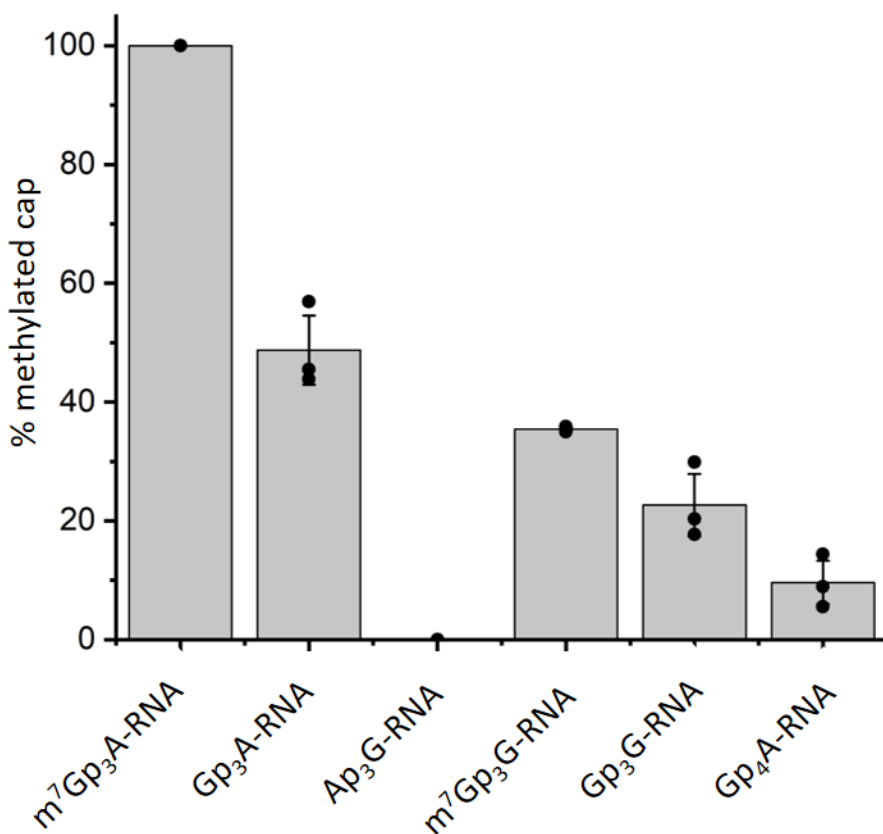

Figure S 10: The comparison of nsp10-nsp16 methylation efficiency of various capped-RNAs without purification from ppp-RNA prior to the methylation reaction.

## NMR spectra

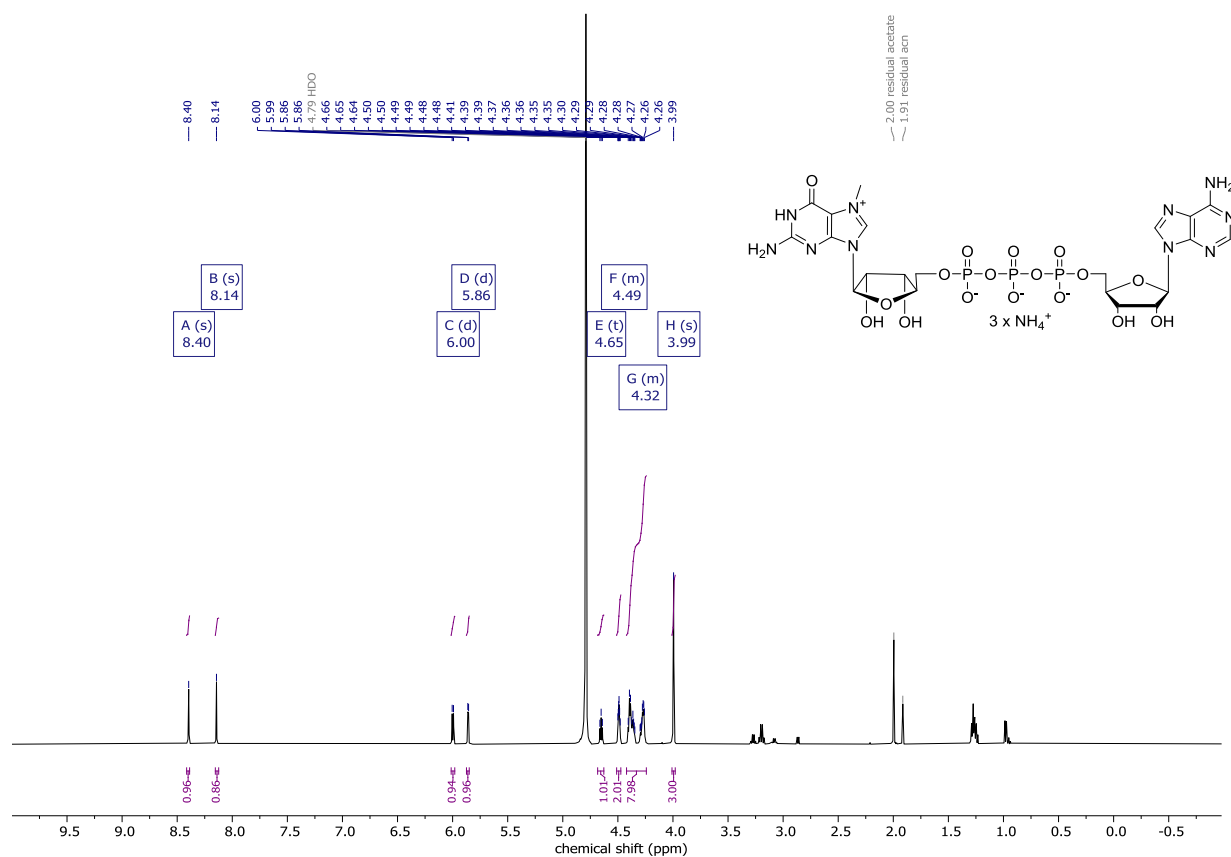

Spectrum 1.  $^1H$  NMR of  $m^7GpppA$ .

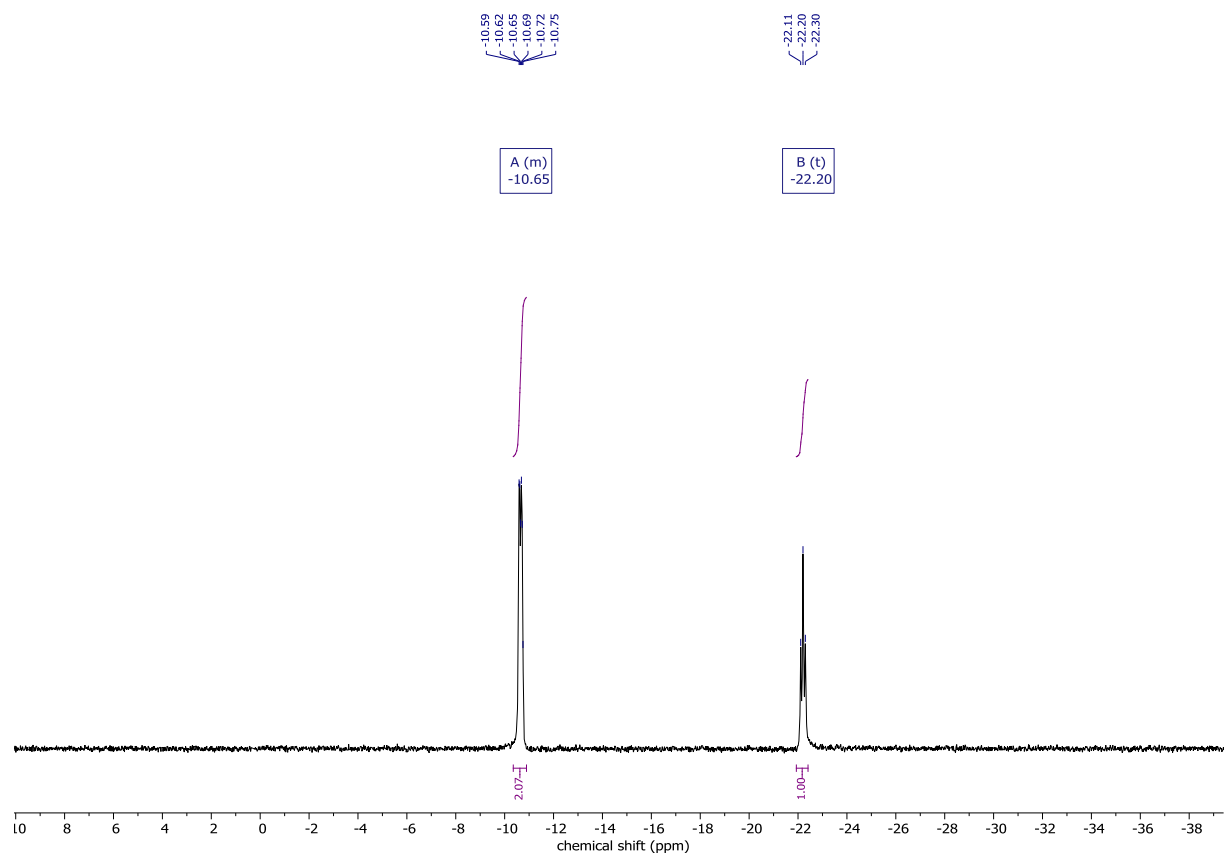

Spectrum 2.  $^{31}\text{P}$  NMR of  $m^7\text{GpppA}$ .

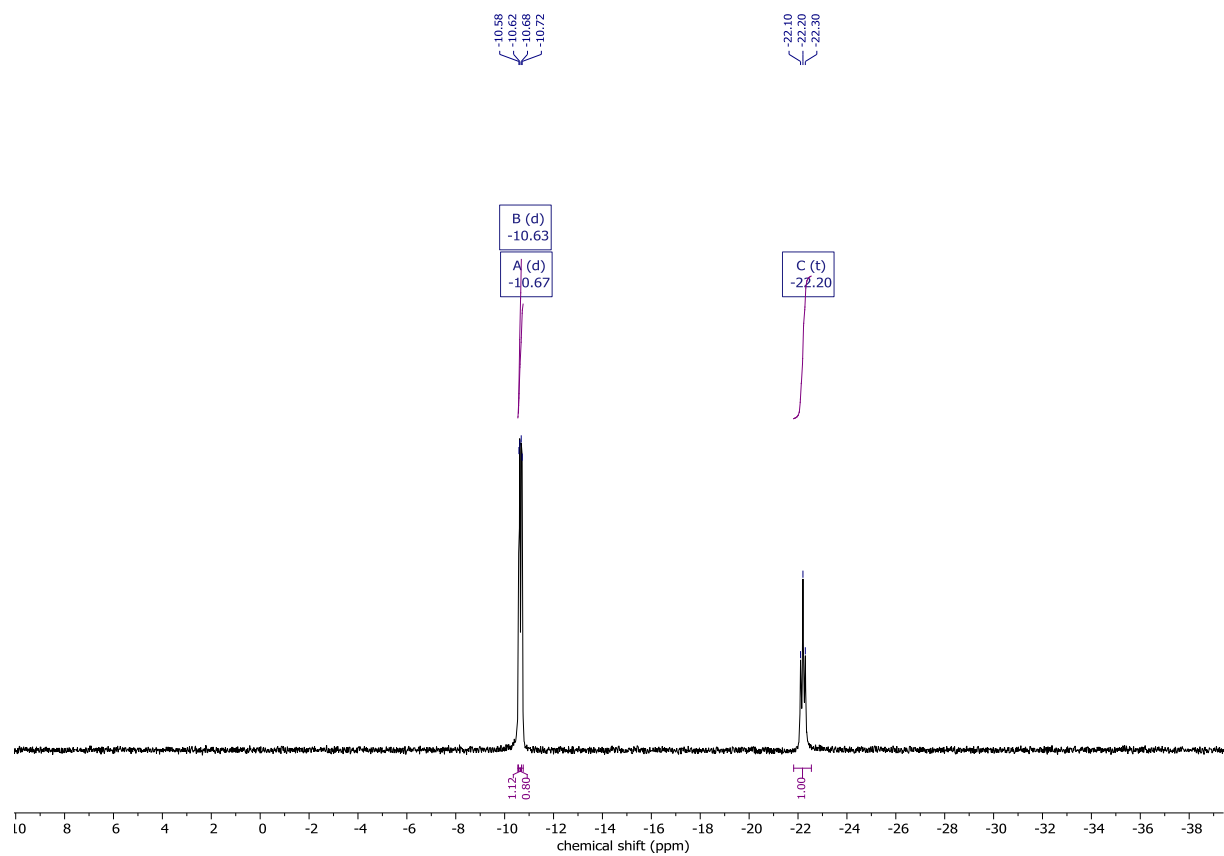

Spectrum 3.  $^{31}\text{P} \{^1\text{H}\}$  NMR of  $m^7\text{GpppA}$ .
